# Supplementary material for: Intra-abdominal fat volume estimation by multi-detector rows computed tomography: relevance in surgical fellowship training program in Shanghai: a retrospective study
Source: PeerJ. 2023 Apr 19;11:e15156. doi: 10.7717/peerj.15156 (PMC10122455; doi:10.7717/peerj.15156)
Supplement: Data S1 [file peerj-11-15156-s001.xls]

## Sheet: Sheet1
Research Number	Hospitalized Code	Patient No.	sex	Age	Radiological Code	hospitalized days after operation	Hospitalized Span	If any, specified as	Occupation	Retirement	Urban/suburb/rural	career span	Type of working	working hour per day	outdoor working hour per day	labor hour per day	excising hour per day	sleeping hour per day	sleeping quality	total family income per month	If any, specified as	nutrition condition	weight	height	BMI	waist circle	total area	class area	class area%	total volume	class volume	class volume%	abdominal subcutaneous fat(SCF)	abdominal anterior-posterior diameter(APD)	transverse diameter(TD)	intra-abdominal fat volume(IFV)	creatinine/height	ALB	pre-alb	LY	Anemia	HB	MCV	MCH	MCHC	EOS	NE	perioperative transfusion	If any, specified as
	z008341	1	Female	78		41	46																		22.84	56.9
	z097264	2	Female	72	636624	11	20																		29.44	62.3
	z100990	3	Male	76	788585	12	20																66	1.64	25.1	65.3
	z105279	4	Female	75	39241	16	21																		32.21	65.3
	z187047	5	Male	50	i100047983	14	22																		23.85	68.3
	z214034	6	Male	54	1121178	14	21																		25.16	68.9
	z214593	7	Female	65	i100098179	14	17																		31.85	71
	z215681	8	Male	48	i100096044	11	13																		25.87	71.2
	z215813	9	Male	63	1122813	16	21																		25.64	72.1
	z216424	10	Female	80	i100103722	15	22																		25.13	72.8
	z216638	11	Male	81	i100102498	19	24																		19.22	74.5
	z216737	12	Male	71	1125844	11	26																		26.45	74.6
	z217326	13	Male	47	1128344	11	14																		23.64	75.3
	z217397	14	Male	75	1128749	15	22																		32.85	75.4
	z218482	15	Female	72	1132883	11	17																		23.64	75.6
	z218551	16	Female	58	1133172	23	33																		24.05	75.8
	z218626	17	Male	69	1133220	13	33																		24	78.2
	z218670	18	Male	65	1133274	11	15																		28.54	78.6
	z218685	19	Male	57	i100105241	23	36																		26.3	79.1
	z218729	20	Male	66	i100106158	25	29																		25.66	81.3
	z218772	21	Male	61	1134095	13	19																		20.88	85.3
	z218817	22	Male	67	1134094	17	23																		24.37	92.6
	z219140	23	Male	56	i100103827	66	74																70	1.7	20.64	99.3
	z219427	24	Male	62	1136082	17	21																		23.61	57.8
	z219494	25	Female	81	1136272	22	25																		22.99	57.9
	z219846	26	Female	61	1137595	13	17																		22.88	61.3
	z220382	27	Female	55	i100112980	23	29																		21.3	62
	z220911	28	Female	56	1140958	17	22																		24.78	62
	z220919	29	Male	60	i100086795	15	20																		23.92	64.3
	z221180	30	Male	61	1141370	18	23																		24.88	64.3
	z221211	31	Male	53	1142236	24	31																		25.14	64.3
	z221460	32	Female	54	1142563	10	12																		28.45	64.3
	z221865	33	Male	59	1143928	9	16																		23.95	65.3
	z222943	34	Male	55	1148679	10	19																		32.56	65.3
	z223137	35	Female	79	i100112506	66	70																		32.63	65.3
	z223713	36	Female	61	1150489	11	15																		22.99	65.8
	z223763	37	Male	73	1151960	14	24																59	1.61	25.89	66
	z224074	38	Male	55	1152149	12	19																		24.3	66.3
	z224254	39	Male	78	i100114476	19	24																71	1.65	28.4	66.3
	z224687	40	Female	31	R001155399	12	19		IT	No	urban	8	computer based	8	0	0	0	8	good	high			50	1.6	24.58	66.4							2.5				62.0/1.60	40	255	1.61		124	87.9	29.8	339	0.2	3.65
	z224828	41	Male	90	1155404	24	40																		24.31	67.2
	z224965	42	Male	62	i100116436	18	23																64	1.65	24.78	67.2
	z224998	43	Male	62	1156290	14	20																61	1.73	26.77	67.2
	z225206	44	Female	60	1158226	21	29																67	1.57	24.12	67.8
	z225213	45	Male	41	1156962	16	23																60	1.72	25.64	68
	z225708	46	Male	64	1159766	31	34																		29.13	68.2
	z225943	47	Female	77	1160794	35	39																50	1.58	24.64	68.5
	z226356	48	Male	67	1002866	28	36																48.5	1.71	25.87	68.7
	z226425	49	Male	78	i100119527	12	19																64	1.67	24.69	69.3
	z226905	50	Male	47	1165034	10	16																		26.47	69.3
	z227211	51	Male	58	1165570	15	18																67	1.7	27.45	69.3
	z228073	52	Male	64	i100122336	15	20																60	1.7	19.44	69.5
	z228109	53	Male	63	1168767	14	22																		22.81	69.5
	z228230	54	Female	58	1169075	12	14																		23.65	69.5
	z228295	55	Male	44	1169407	120	127																		25.61	70.2
	z228540	56	Male	55	1170314	14	17																		27.65	70.2
	z228905	57	Female	74	1171153	17	21																60	1.58	23.64	70.3
	z228956	58	Male	47	1171989	10	15																		24.33	70.5
	z229089	59	Female	71	1171948	15	20																		27.59	70.6
	z229247	60	Male	79	1172597	22	29																63	1.71	27.84	70.6
	z229620	61	Female	52	1174138	13	18																		19.51	71
	z229653	62	Male	75	i100117889	16	20																56	1.69	24.64	71
	z229743	63	Female	28	1174283	11	16																		22.88	71.2
	z229940	64	Female	64	1175545	30	36																56	1.57	24.99	71.2
	z230094	65	Male	61	1176117	14	20																		26.54	71.2
	z230340	66	Female	68	i100125706	47	59																		27.69	71.4
	z230495	67	Female	49	1177474	21	32																		28.32	71.4
	z230586	68	Male	62	1178893	12	17																		23.97	71.5
	z230923	69	Male	60	i100129545	11	18																		23.94	71.6
	z231613	70	Female	58	1182269	13	18																50	1.64	24.79	71.9
	z231873	71	Male	69	1182968	12	19																67	1.68	24.15	72
	z231875	72	Male	53	i100131336	15	18																84	1.71	20.65	72.3
	z232003	73	Female	27	i100130102	12	19		office lady	No	urban	12	office	8	0	0	0	8	good				58.5	1.62	25.44	72.3												40	291	1.83		140	92.2	31.9	346	0.28	2.95	no
	z232238	74	Male	77	1180485	13	23																49	1.65	25.99	72.3
	z233001	75	Female	65	1187431	15	30																		26.88	72.4
	z233158	76	Male	78	637395	10	16																70	1.72	23.95	72.5
	z233255	77	Male	52	1182228	11	17																84	1.74	27.88	72.5
	z233471	78	Male	37	1189306	11	16																		19.84	72.9
	z233852	79	Male	49	1190139	14	17																		25.31	73.2
	z234143	80	Male	52	1190956	10	16																61	1.68	25.04	73.5
	z234365	81	Male	60	968778	13	18																62	1.68	23.84	73.6
	z234371	82	Male	46	1192115	11	15																		30.12	73.8
	z234720	83	Female	60	230079	13	19																		33.24	73.8
	z235184	84	Male	47	i100138050	13	19																76	1.73	22.95	73.9
	z235637	85	Male	62	1196734	11	16																		25.12	74
	z235905	86	Female	39	1123191	11	18																		26.31	74
	z235949	87	Male	64	1198707	10	16																		26.12	74.1
	z236590	88	Male	62	1201239	10	15																		27.84	74.1
	z236943	89	Male	46	1203110	9	12																		24.17	74.2
	z237192	90	Female	64	1204120	11	17																		25.37	74.2
	z237492	91	Female	54	1206564	13	18																		25.44	74.2
	z237707	92	Female	52	1206981	17	21																		25.63	74.2
	z237927	93	Female	45	1207847	11	19																		26.49	74.2
	z238176	94	Male	65	1208636	15	20																		21.45	74.3
	z239266	95	Female	52	159802	13	20																		23.85	74.3
	z239687	96	Male	65	1214874	12	15																		24.76	74.3
	z239832	97	Female	40	1215175	16	19																		25.02	74.3
	z240163	98	Female	75	1118639	8	17																		28.63	74.3
	z240974	99	Male	52	i100000586	10	16																		18.83	74.5
	z241356	100	Male	65	1220342	12	15																		23.61	74.5
	z241510	101	Male	82	1221221	18	27																		29.46	74.5
	z241570	102	Female	40	1220995	10	12																		17.95	74.6
	z241934	103	Male	58	1222222	11	17																		24.15	74.6
	z242122	104	Male	74	1222528	16	25																		24.22	74.6
	z242450	105	Male	82	1223406	12	20																		24.55	74.6	9621	2546	26.5	22842	1293.56	5.7		154	288.3
	z242528	106	Male	60	1223776	12	19																		24.65	74.6
	z242534	107	Female	69	1223619	13	18																		26.98	74.6
	z242740	108	Female	78	i100152134	15	23																		28.61	74.6
	z243088	109	Female	50	1225062	16	19																		23.95	74.8	7912	1764.38	22.3	42278.1	7354.47	17.2		163	294
	z243535	110	Male	53	1226503	29	36																		30.25	74.9	30859	10681	54	29484	3980.9	13.5		185	308.7
	z244172	111	Male	71	1228530	12	20																		23.66	75
	z244277	112	Male	61	1228786	15	20																		28.41	75
	z244617	113	Female	73	1229966	20	25																		24.15	75.2
	z244704	114	Female	66	1230269	11	20																		25.32	75.2
	z244937	115	Female	58	i100159205	28	31																		26.48	75.2
	z245796	116	Male	50	1233726	11	16																		30.65	75.2
	z246054	117	Male	76	88668	12	17																		24.32	75.3
	z246710	118	Female	63	1238110	15	20																		24.57	75.3
	z247157	119	Male	48	1239830	14	18																75	1.72	26.89	75.3
	z247203	120	Female	76	884144	35	38																		24.58	75.4
	z247534	121	Male	59	1241366	13	18																75	1.76	32.54	75.4
	z248032	122	Female	51	1243569	13	17																		32.56	75.4
	z248105	123	Male	59	1243829	25	31																		24.12	75.6
	z248492	124	Female	66	1245871	11	18																64	1.6	24.64	75.6
	z248640	125	Male	61	1245909	11	16																66	1.72	24.84	75.6
	z249309	126	Male	67	i100165224	12	19																		24.87	75.6
	z249374	127	Male	36	i100169907	10	16		个体户	no	urban	20	office	8	0	0	0	8	good				62		29.32	75.6												42	425	1.58		141	88.1	31.2	354	0.02	2.7
	z249973	128	Male	62		9	16																		29.47	75.6
	z250705	129	Male	62	1252600	11	14																		19.88	76
	z250767	130	Male	58	1253000	11	17																		25.44	76
	z250784	131	Female	55	1252998	12	17																		25.93	76
	z250793	132	Female	63	i100099212	15	21																		24.54	76.1
	z251126	133	Male	60	1255052	11	21																		21.56	76.3
	z252067	134	Male	48	1257560	13	16																		24.56	76.3
	z252476	135	Male	41	1259336	11	13																		25.45	76.3
	z252732	136	Male	74	1260432	9	17																		26.87	76.3
	z252787	137	Male	71	1260687	14	21																		25.3	76.4
	z253409	138	Male	54	1262040	11	17																		27.81	76.4
	z254216	139	Female	81	1265039	11	14																		30.22	77.2
	z254494	140	Female	55	67801	9	13																		31.23	77.4
	z254512	141	Male	59		11	17																		24.03	77.5
	z254775	142	Female	39	1268324	12	22																		24.66	77.5
	z255125	143	Female	72	1269134	11	17																		25.33	77.5
	z255144	144	Male	65	1269629	12	20																		28.12	78
	z255313	145	Male	76	1270429	10	16																		24.67	78.2
	z256111	146	Female	72		11	18																		24.7	78.2
	z256316	147	Male	44		13	17																		24.71	78.2
	z256526	148	Female	40		14	16																		24.98	78.2
	z256567	149	Female	67		12	15																		25.44	78.2
	z256866	150	Male	39		9	15																		26.48	78.2
	z256965	151	Male	43		13	17																		24.31	78.3
	z257012	152	Female	78		24	26																		24.56	78.3
	z257133	153	Male	44		9	14																		30.22	78.3
	z257199	154	Male	60		12	18																		23.9	78.4
	z257562	155	Male	54		9	16																		24.65	78.4
	z257592	156	Male	53		9	12																		25.61	78.4
	z257652	157	Male	72		10	14																		30.87	78.4
	z257734	158	Male	66		10	13																		28.54	78.5
	z257865	159	Male	40		12	15																		31.02	78.5
	z258269	160	Male	67		10	15																		24.31	78.6
	z258621	161	Male	52		9	14																		24.67	78.6
	z258688	162	Female	53		10	13																		25.4	78.6
	z258746	163	Male	78		17	38																		25.67	78.6
	z259101	164	Male	78		16	21																		30.16	78.6
	z259359	165	Female	62		11	15																		30.98	78.6
	z259442	166	Male	42		12	14																		25.46	78.8
	z259851	167	Female	37		12	18																		24.78	79.2
	z259894	168	Female	55		12	17																		30.35	79.3
	z260137	169	Male	72		18	25																		31.65	79.3
	z260225	170	Male	63		10	14																		23.44	79.4
	z260460	171	Male	72		13	17																		24.8	79.4
	z260533	172	Female	60		10	13																		25.6	79.4
	z260586	173	Male	74		28	42																		32.88	79.5
	z260604	174	Female	48		11	17																		24.18	79.6
	z260751	175	Male	64		9	14																		31.54	79.6
	z261328	176	Female	42		13	21																		31.65	79.6
	z261333	177	Male	73		26	30																		18.45	80.2
	z261485	178	Male	62		11	17																		24.03	80.2
	z261503	179	Male	62		10	16																		25.1	80.2
	z262159	180	Male	47		12	15																		25.78	80.2
	z262280	181	Male	58		10	17																		29.44	80.2
	z262318	182	Female	43		9	17																		24.78	80.3
	z262791	183	Male	60		12	18																		25.11	80.6
	z262829	184	Female	74		14	18																		26.54	80.6
	z262954	185	Female	84		10	18																		24.69	80.9
	z262969	186	Male	74		12	16																		26.34	81.4
	z262980	187	Male	55		11	20																		24.153	81.5
	z263421	188	Male	74		13	18																		27.44	82.5
	z264011	189	Male	66		23	28																		22.77	83
	z264095	190	Male	56		12	18																		27.56	83.4
	z264199	191	Male	62		15	21																		19.64	84.2
	z264338	192	Male	50		11	16																		24.16	84.2
	z264517	193	Male	56		15	20																		25.94	84.2
	z265225	194	Male	75		10	22																		25.11	84.3
	z265229	195	Female	34		8	14																		31.66	84.33
	z265408	196	Female	57		11	15																		23.9	84.6
	z265531	197	Male	53		8	12																		25.1	84.6
	z265892	198	Female	47		11	17																		25.19	84.6
	z266224	199	Female	43		11	14																		26.33	85.2
	z266410	200	Male	55		12	20																		27.45	85.2
	z266461	201	Male	51		11	18																		29.65	85.2
	z266519	202	Male	67		15	18																		24.89	85.3
	z267380	203	Male	64		11	14																		24.92	85.4
	z267445	204	Female	63		14	18																		22.61	85.47
	z267728	205	Female	57		11	16																		28.97	85.6
	z267757	206	Male	50		11	16																		24.83	86
	z267772	207	Male	50		14	21																		24.22	87.5
	z267795	208	Female	57		10	15																		25.1	88.3
	z267988	209	Male	78		16	21																		23.91	88.7
	z268374	210	Male	56		16	20																		22.94	89.3
	z268506	211	Male	52		10	16																		24.56	89.6
	z268671	212	Male	71		14	21																		30.55	90.2
	z268923	213	Male	56		9	14																		27.44	90.7
	z269108	214	Male	70		13	21																		28.87	91.5
	z269416	215	Male	74		12	22																		25.45	91.6
	z269734	216	Female	31		10	14																		28.2	92
	z269741	217	Male	61		12	18																		24.68	92.3
	z269847	218	Female	72		11	17																		23.45	92.4
	z270008	219	Female	45		11	14																		25.47	92.5
	z270423	220	Female	64		13	15																		24.87	92.6
	z271197	221	Male	74		24	30																		25.86	92.8
	z271215	222	Female	62		14	16																		29.67	94.2
	z271369	223	Male	61		15	21																		28.645	95.3
	z271370	224	Male	68		14	19																		21.88	96.3
	z271512	225	Male	60		13	15																		23.82	98.3
	z271659	226	Male	57		9	14																		24.88	963
[truncated: 72 more columns]
